# Supplementary material for: An enzyme-controlled mesoporous nanomachine for triple-responsive delivery
Source: Royal Society of Chemistry journal article supplement (doi:10.1039/d2tb01069k), 2022-01-01
Supplement: d2tb01069k1.pdf [file d2tb01069k1.pdf]

## SUPPORTING INFORMATION

### Enzyme-controlled mesoporous nanomachine for triple-responsive delivery.

Beatriz Mayol<sup>‡</sup>, Victor Dato<sup>‡</sup>, Manuel Estravís<sup>‡</sup>, Elena Lucena<sup>§,♦,°</sup>, Paula Díez<sup>§,♦,°</sup>, Sandra Jimenez-Falcao<sup>‡</sup>, Anabel Villalonga<sup>‡</sup>, Félix Sancenón<sup>§,♦,°</sup>, Alfredo Sánchez<sup>‡</sup>, Diana Vilela<sup>‡</sup>, Paloma Martínez-Ruiz<sup>‡</sup>, Ramón Martínez-Mañez<sup>§,♦,°,‡,\*</sup> and Reynaldo Villalonga<sup>‡,\*</sup>.

<sup>‡</sup> Nanosensors and Nanomachines Group, Department of Analytical Chemistry, Faculty of Chemistry, Complutense University of Madrid, 28040 Madrid, Spain.

<sup>§</sup> Instituto Interuniversitario de Investigación de Reconocimiento Molecular y Desarrollo Tecnológico (IDM), Universitat Politècnica de València, Universitat de València, Camino de Vera s/n, 46022, Valencia, Spain.

<sup>♦</sup> Unidad Mixta UPV-CIPF de Investigación en Mecanismos de Enfermedades y Nanomedicina, Universitat Politècnica de València, Centro de Investigación Príncipe Felipe, Valencia, Spain.

<sup>°</sup> CIBER de Bioingeniería, Biomateriales y Nanomedicina (CIBER-BBN), Spain.

<sup>‡</sup> Unidad Mixta de Investigación en Nanomedicina y Sensores. Universitat Politècnica de València, Instituto de Investigación Sanitaria La Fe, Valencia, Spain.

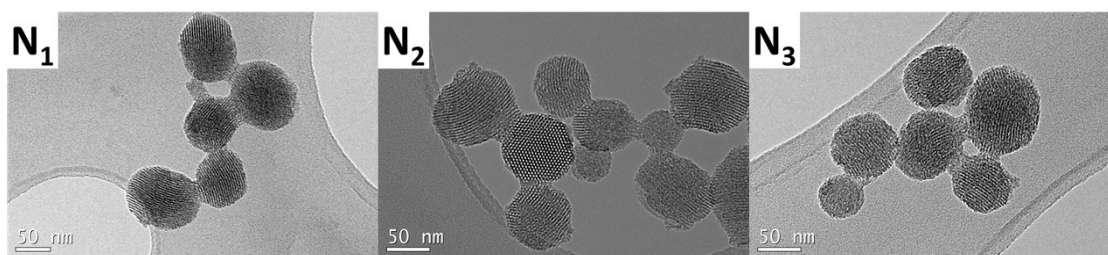

Figure 1S. Representative TEM images of solids N<sub>1</sub> – N<sub>3</sub>.

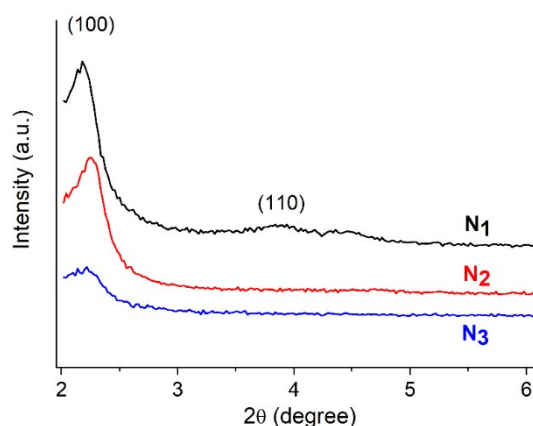

Figure 2S. Powder X-ray diffraction of solids N<sub>1</sub> – N<sub>3</sub>.

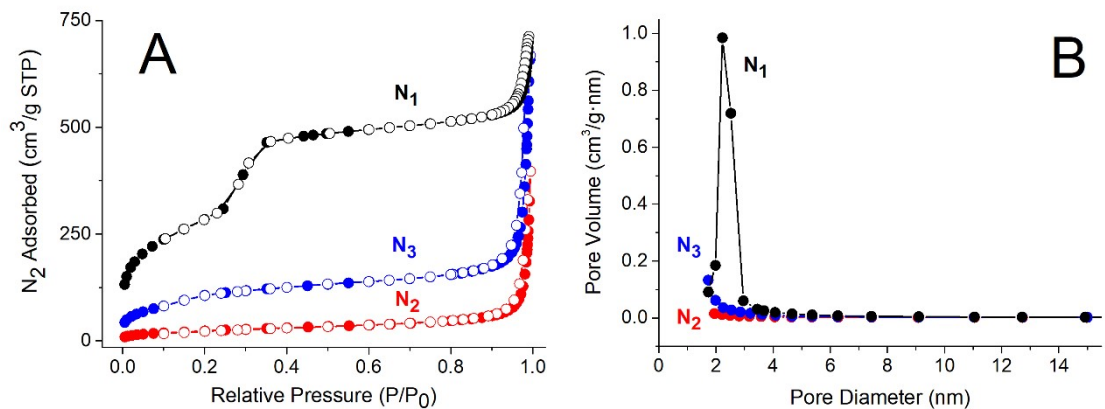

Figure 3S. Nitrogen adsorption (filled circles)/desorption (open circles) isotherms (A) and pore size distribution (B) of solids  $N_1 - N_3$ .

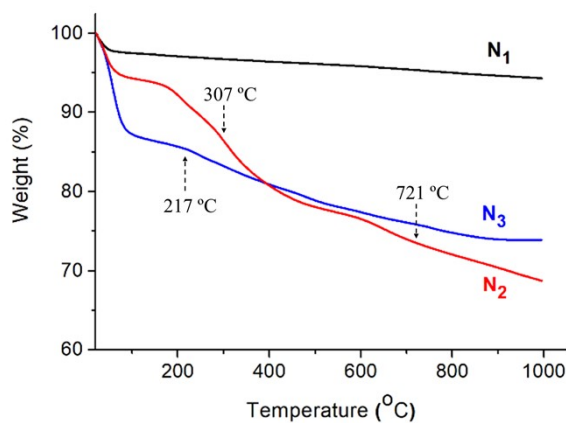

Figure 4S. Thermogravimetric analysis of solids  $N_1 - N_3$ .

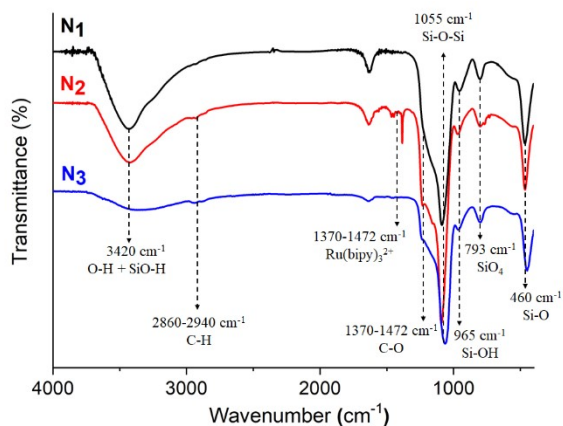

Figure 5S. FT-IR analysis of solids  $N_1 - N_3$ .

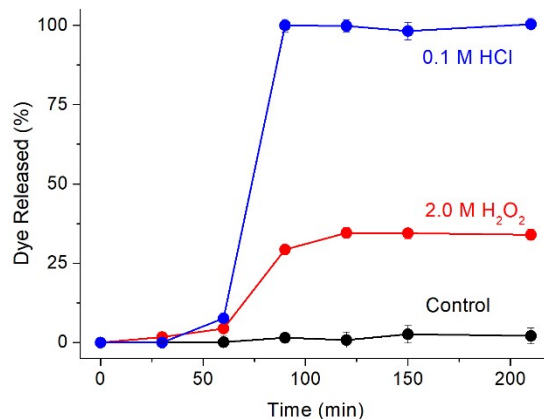

Figure 6S. Kinetics of dye release from the nanomachine N<sub>3</sub> in 100 mM sodium sulfate, pH 7.5, in the absence and the presence of 0.1 M HCl and 2.0 M H<sub>2</sub>O<sub>2</sub>, added after 60 min incubation. 100% represents maximum dye release in each experiment.

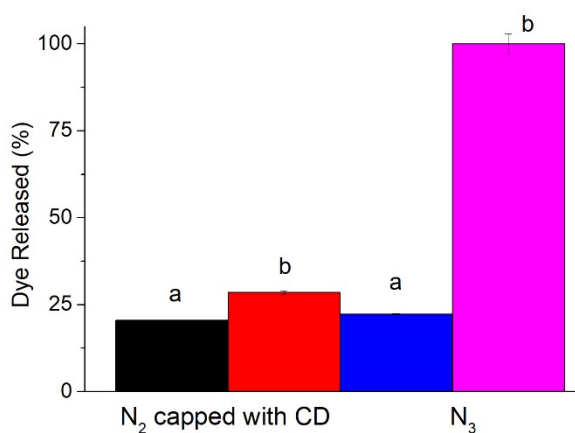

Figure 7S. Relative dye released from the solid N<sub>2</sub> capped with β-cyclodextrin and solid N<sub>3</sub> in 100 mM sodium phosphate buffer, pH 7.5, in the absence (a) and the presence of 100 mM D-glucose (b). 100% represents maximum dye release in each experiment.

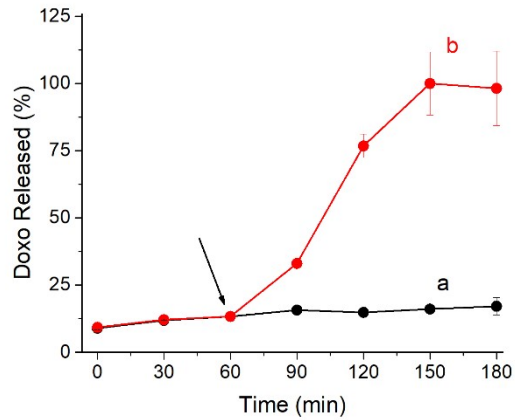

Figure 8S. Kinetics of Doxo release from the nanomachine  $N_4$  in 100 mM sodium phosphate buffer, pH 7.5 in the absence (a) and the presence (b) of 100 mM D-glucose, added after 60 min incubation. 100% represents maximum drug release in each experiment (n=3).

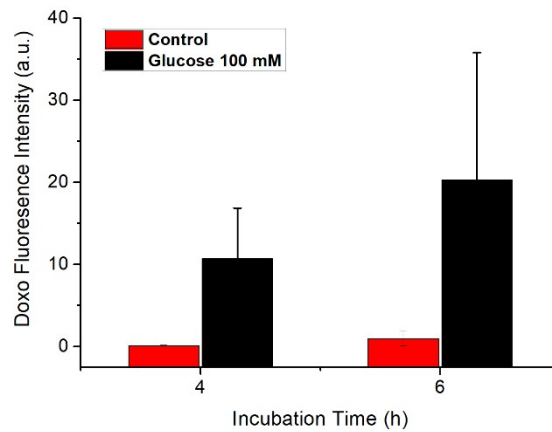

Figure 9S. Doxorubicin-associated fluorescence intensity in HeLa cells incubated with  $N_4$ , from confocal images at different incubation times and with or without the addition of 100 mM D-glucose.
